# Supplementary material
Source: Springer Nature journal article supplement (https://www.springermedizin.de/resource/supplementary/12885_2012_4384_MOESM1_ESM.pdf/9466136)

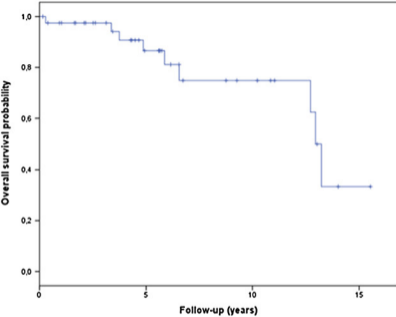

**A:** Overall survival

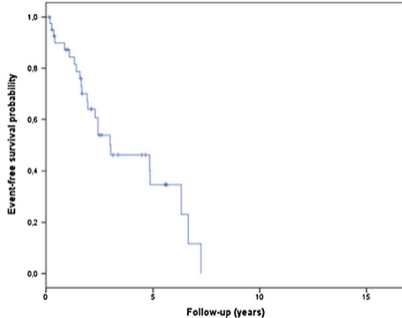

**B:** Disease-free survival

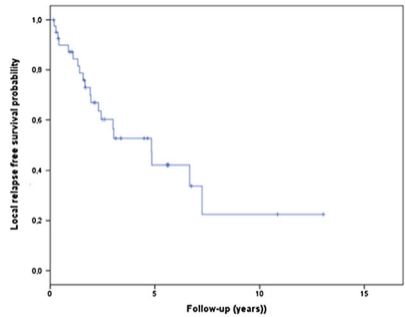

**C:** Local relapse-free survival

Supplement: MOESM1 [file 9466136]
